# Supplementary material for: Chondrule-like objects and CAIs in asteroid Ryugu: earlier generations of chondrules
Source: Research Square preprint supplement (doi:10.21203/rs.3.rs-1992208/v1), 2022-08-29
Supplement: Supplementary file 1 [file a2a45a4031121c49dfd990d4.docx]

**Author contributions**

Study was conceived and designed by D. N. and T. Nakamura. Sample preparation by D. N.. Scanning electron microscopy by T. Nakamura, D. N., and T. Morita. Electron microprobe analysis by T. Nakamura, T. Mikouchi, and H. Yoshida. Oxygen isotope analysis by M. Z., N. T. K., and D. N.. Transmission electron microscopy by Y. E., T. Morita, D. N.. D. N. interpreted the data and wrote the paper with input from T. Nakamura, N. T. K., M. Z., T. Mikouchi, H. Yurimoto, and S. Tachibana. M. K., K. A., E. K., T. Y., M. N., A. N., A. M., K. Y., M. A., T. O., T. U., M. Y., T. S., S. Tanaka, S. N., F. T., T. Noguchi, H. Yabuta, H. N., R. O., K. S., S. W., and Y. T. assisted with the analyses.
