# Supplementary material for: Chondrule-like objects and CAIs in asteroid Ryugu: earlier generations of chondrules
Source: Research Square preprint supplement (doi:10.21203/rs.3.rs-1992208/v1), 2022-08-29
Supplement: Supplementary file 2 [file fddd4e9b8a8cf838ecd95657.xlsx]

## Sheet: TableA1
Table A1. Major element compositions of chondrule-like objects and CAIs in the Ryugu samples measured with FE-EPMAa and TEMb
Sample name	Analysis #c	Target	SiO2	TiO2	Al2O3	Cr2O3	FeO	MnO	MgO	CaO	Na2O	NiO	K2O	SO3	P2O5	Total	Mg#
C0002-P5-C1-Chd	1499	Ol	42.39	0.0222	0.0519	0.5919	1.56	0.4128	56.24	0.1818	0.0386	0.0902	n.m.	n.m.	n.m.	101.58	98.46
	1500	Ol	42.9	0.0119	0.0105	0.6815	1.45	1.51	55.68	0.164	0.0509	0.0907	n.m.	n.m.	n.m.	102.55	98.566
	1501	Ol	42.4	0.0379	0.0418	0.5486	1.35	0.3195	55.79	0.1913	0.0507	0.0757	n.m.	n.m.	n.m.	100.8	98.66
C0002-P5-C2-Chd	1476	Ol	42.66	0	0.0204	0.2762	1.1688	0.4716	58.02	0.0198	0.0135	0.1315	n.m.	n.m.	n.m.	102.79	98.88
	1477	Ol	41.09	0.0042	0.0118	0.3013	1.29	0.4838	56.11	0.0176	0.0007	0.0845	n.m.	n.m.	n.m.	99.39	98.729
C0040-02-Chd	2496	Ol	46.99	0.0202	0.0942	0.3276	1.1547	0.4644	46.59	3.03	0.0205	0.124	n.m.	n.m.	n.m.	98.8157	98.6291
	TEM-1	Ol	41.6365	0.169709	0	0.448465	0.423977	1.00466	56.129	0.132179	0	0	0.0555861	n.m.	n.m.	100	99.5812
	TEM-2	Ol	42.1713	0	0	0.535061	0.252922	0.915635	55.9937	0.131419	0	0	0	n.m.	n.m.	100	99.7492
	TEM-3	Ol	42.3107	0	0	0.181059	0	0.76052	56.7478	0	0	0	0	n.m.	n.m.	100	100
	TEM-4	Ol	42.4871	0.18	0	0.269085	0.508783	0.502339	55.9413	0.066091	0	0	0.0555873	n.m.	n.m.	100	99.4962
	TEM-5	Ol	41.9751	0.0853993	0	0.361076	0.34136	0.842591	56.3944	0	0	0	0	n.m.	n.m.	100	99.6641
	TEM-6	Di	55.2168	0.23	0.0944741	0.263077	0.0257296	0.206596	20.9917	22.9189	0	0	0.0602297	n.m.	n.m.	100	99.9313
	TEM-7	Di	55.2596	0	0.396791	0	0.270161	0.0129123	20.9419	23.2827	0	0	0	n.m.	n.m.	100.164	99.2816
	TEM-8	Di	56.5218	0.0300209	0.0188948	0.19	0.180107	0	20.8922	22.1634	0	0	0	n.m.	n.m.	99.9964	99.5188
	TEM-9	Di	56.1084	0	0.298076	0.355353	0.0839872	0.165847	20.9939	21.9945	0	0	0	n.m.	n.m.	100	99.7778
	TEM-10	Di	55.102	0.37	0.177861	0	0.16705	0.0824669	20.6458	23.4358	0	0	0.0547532	n.m.	n.m.	100	99.5516
C0040-02-CAI	2482	Sp	0.0908	0.9306	73.67	0.0934	0.8156	0	24.34	1.2493	0	0.0578	n.m.	n.m.	n.m.	101.247
	2483	Sp	0.0583	0.7684	73.62	0.1099	0.8533	0	24.86	1.149	0.0041	0.0667	n.m.	n.m.	n.m.	101.49
	2484	Hib	0.1622	5.5	80.23	0.0673	0.8549	0.0078	7.1	6.76	0.0007	0	n.m.	n.m.	n.m.	100.683
	2485	Hib	0.2329	5.05	79.28	0.1093	0.7609	0.0188	9.31	6.05	0.0078	0.0706	n.m.	n.m.	n.m.	100.89
	2486	Sp	0.3482	0.0345	71.54	0.1414	0.8916	0	27.72	0.0143	0.0024	0.0473	n.m.	n.m.	n.m.	100.74
	2487	Sp	1.2879	0.2319	67.8	0.1207	1.0294	0	27.55	0.11	0.0177	0.0314	n.m.	n.m.	n.m.	98.1791
	2811	Phyl	19.733	0.088	16.106	1.003	12.082	0.207	28.914	0.111	0.362	0.286	0.033	5.627	0.289	84.841
	2812	Phyl	18.538	0.083	17.751	0.329	6.685	0.311	28.183	0.071	0.101	0.053	0.002	5.426	0.418	77.951
	2813	Phyl	19.27	0.06	17.221	0.907	10.032	0.243	30.197	0.188	0.319	0.294	0.012	4.976	0.217	83.936
	2814	Phyl	21.556	0.131	15.134	0.479	8.752	0.291	28.347	0.075	0.147	0.149	0.037	5.309	0.354	80.761
	2815	Phyl	21.545	0.085	14.083	1.619	13.78	0.203	24.837	0.231	0.671	0.577	0.037	4.107	0.112	81.887
C0076-10-CAI	5845	Sp	0.2097	0.1717	70.42	0.154	0.7116	0	28.44	0.0197	0	0.0729	n.m.	n.m.	n.m.	100.2
	5846	Sp	0.4999	0.1911	70.47	0.1492	0.6756	0.0016	28.43	0.0158	0.0021	0.0231	n.m.	n.m.	n.m.	100.458
	5847	Sp	0.7577	0.2353	69.61	0.1509	0.6965	0.0092	27.74	0.0078	0.0087	0	n.m.	n.m.	n.m.	99.2161
	5848	Sp	0.5247	0.1747	71.34	0.1454	0.7069	0.0076	28.7	0.0049	0.0066	0.0497	n.m.	n.m.	n.m.	101.66
	5995	Phyl	35.573	0.097	21.736	0.435	5.463	0.07	27.765	0.263	0.109	0.381	0.001	0.898	0.075	92.866
	5996	Phyl	44.318	0.104	7.891	0.474	5.654	0.148	22.368	0.127	0.232	0.543	0.03	1.027	0.063	82.979
	5997	Phyl	34.901	0.093	3.631	0.44	8.596	0.23	19.874	0.588	0.149	0.572	0.021	2.163	0.109	71.367
	5998	Phyl	40.911	0.073	5.108	0.444	4.975	0.109	17.203	0.115	0.196	0.367	0.021	0.842	0.089	70.453
	5999	Phyl	34.076	0.091	3.239	0.436	8.726	0.145	19.287	0.113	0.06	0.617	0	2.575	0.049	69.414
	6000	Phyl	37.744	0.099	3.173	0.566	6.476	0.181	21.578	0.296	0.12	0.499	0.044	1.418	0.103	72.297
a Detection limits of individual elements are shown in Nakamura et al. (2022).
b Total wt% is normalized to 100, and TEM analysis spots are not shown in any figure.
c Analysis spots are shown in supplementary figures.

## Sheet: TableA2
Table A2. Raw SIMS measured oxygen isotope data of chondrule-like objects and CAIs in the Ryugu samples
Analysis_#	Sample	d18O ‰ RAW	2SE	d17O ‰ RAW	2SE	D17O ‰ RAW	2SE	16O (Mcps)	OH correction (‰)a	IMFb	IMF	d18O ‰	Error (2SD)	d17O ‰	Error (2SD)	D17O ‰	Error (2SD)
20220424_52	3Hole_Disk_SCOl	0.687213	2.67778	0.747781	4.05025	0.39043	4.28292	0.319877	0.424993
20220424_53	3Hole_Disk_SCOl	0.255835	2.02135	-0.43107	3.4694	-0.564105	3.62513	0.320422	0.448367
20220424_54	3Hole_Disk_SCOl	1.08618	2.69029	8.89974	4.90199	8.33493	5.0977	0.318503	0.41613
	Average Standard & 2SD for C0002-P5-C2-Chd & C1-Chd/52-54, 61-63 (N=6)	0.782139	1.96017	1.64371	7.90696	1.237	8.4679				-4.51385
20220424_57	3Hole_C0002-P5_Clast2_Chd spot1_Ol	-44.9556	3.97824	-45.218	5.93694	-21.8411	6.28703	0.290842	0.339966	0.219088	-4.29575	-39.8088	1.96017	-43.6339	7.90696	-22.9333	8.4679
20220424_58	3Hole_C0002-P5_Clast2_Chd spot2_Ol	-52.0517	1.72578	-48.8467	5.97084	-21.7799	6.0379	0.278841	0.33939	0.219088	-4.29575	-47.491	1.96017	-47.8245	7.90696	-23.1292	8.4679
20220424_59	3Hole_C0002-P5_Clast1_Chd spot1_Ol	-1.52005	3.54597	-2.68747	6.33296	-1.89704	6.59594	0.209988	0.534531	0.219088	-4.29575	2.55751	1.96017	-2.45711	7.90696	-3.78702	8.4679
20220424_60	3Hole_C0002-P5_Clast1_Chd spot2_Ol	-5.98644	3.15944	-4.7671	6.22638	-1.65416	6.43948	0.200674	0.300985	0.219088	-4.29575	-1.35203	1.96017	-3.73241	7.90696	-3.02935	8.4679
20220424_61	3Hole_Disk_right_SCOl	-0.520646	2.21252	4.68512	4.59628	4.95585	4.73809	0.328538	0.374282
20220424_62	3Hole_Disk_right_SCOl	1.19539	2.36017	1.23969	6.08387	0.618083	6.20643	0.319101	0.369916
20220424_63	3Hole_Disk_right_SCOl	1.89507	2.04445	-2.9577	4.99689	-3.94314	5.10873	0.318777	0.381387
20220424_95	7 hole_Disk, SC-Ol	4.18312	2.51798	3.50313	5.85575	1.32791	6.00035	0.32172	0.16328
20220424_96	7 hole_Disk, SC-Ol	4.58209	2.11564	6.32507	3.80759	3.94238	3.96333	0.327574	0.153409
20220424_97	7 hole_Disk, SC-Ol	1.28566	2.39599	3.78851	5.75891	3.11997	5.89214	0.327683	0.154093
	Average Standard & 2SD for C0040-02-CAI/95-97, 102-104 (N=6)	1.81297	2.43068	2.09315	4.81049	1.1504	4.05216				-3.48847
20220424_98	7 hole_C0040-02-CAI spot1_Hib	-46.4647	2.61051	-49.2065	6.42755	-25.0449	6.56933	0.22778	0.442297	-3.04131	-6.51917	-39.1057	2.43068	-46.4681	4.81049	-26.1331	4.05216
20220424_99	7 hole_C0040-02-CAI spot2_Sp	-51.4532	2.80066	-46.4488	6.94025	-19.6931	7.0914	0.231217	0.243687	-3.32898	-6.80584	-43.144	2.43068	-42.6538	4.81049	-20.2189	4.05216
20220424_100	7 hole_C0040-02-CAI spot3_Sp	-47.6122	3.11774	-44.6668	7.6228	-19.9085	7.79329	0.223152	0.186031	-3.32898	-6.80584	-42.4943	2.43068	-44.0146	4.81049	-21.9176	4.05216
20220424_101	7 hole_C0040-02-CAI spot4_Sp	-50.2598	3.30839	-46.7358	4.31541	-20.6007	4.64568	0.232434	0.317771	-3.32898	-6.80584	-43.0895	2.43068	-44.1594	4.81049	-21.7528	4.05216
20220424_102	7 hole_Disk, SC-Ol	1.56693	2.98211	1.06736	5.48913	0.252561	5.70396	0.322581	0.183852
20220424_103	7 hole_Disk, SC-Ol	0.632855	1.85196	-1.48094	4.3237	-1.81002	4.42965	0.33509	0.161683
20220424_104	7 hole_Disk, SC-Ol	0.979453	2.01814	2.6705	4.06176	2.16118	4.19514	0.331452	0.14614
	Average Standard & 2SD for C0040-02-Chd & C0076-10-CAI/102-104, 108-110 (N=6)	1.32605	1.33139	2.19694	5.38886	1.5074	5.15226				-3.97281
20220424_105	7 hole_C0040-02-Chd spot1_Ol	-48.281	2.51903	-46.57	4.98288	-21.4639	5.15217	0.290466	0.113915	0.219088	-3.75459	-44.3853	1.33139	-46.0181	5.38886	-22.9377	5.15226
20220424_106	7 hole_C0076-10-CAI spot1_Sp	-51.6512	2.34121	-48.9478	7.64778	-22.0892	7.74407	0.229327	0.158495	-3.32898	-7.28856	-43.9597	1.33139	-46.27	5.38886	-23.4109	5.15226
20220424_107	7 hole_C0076-10-CAI spot2_Sp	-47.0437	3.37293	-47.7206	6.44106	-23.2579	6.67559	0.236456	0.173764	-3.32898	-7.28856	-40.2631	1.33139	-45.9948	5.38886	-25.058	5.15226
20220424_108	7 hole_Disk, SC-Ol	1.36595	1.88205	6.61749	5.21912	5.9072	5.31008	0.34703	0.144595
20220424_109	7 hole_Disk, SC-Ol	1.8447	3.17319	2.18251	6.18556	1.22326	6.40186	0.34395	0.133777
20220424_110	7 hole_Disk, SC-Ol	2.28556	2.27111	3.747	4.45476	2.55851	4.60865	0.350636	0.133075
aOH correction (‰) = 16O1H- intensity/[17O- intensity ×(17O- tail/17O- intensity)]×1000; 17O- tail/17O- intensity = 2.1×10-5.
bCorrection for instrumental bias using standards that have similar chemical compositions to the target phases.

## Sheet: TableA3
Table A3. The instrumental bias relative to SCOl among different standards.
Standard name	Mineral	Standard					SCOL (bracketing analyses)					Bias relative to SCOL ± 2SE (‰)b		laser Fluorination
		d18O ± 2SD (‰)		Bias ± 2SE (‰)a		N	d18O ± 2SD (‰)		Bias ± 2SE (‰)		N			d18O (‰)	Ref
HN-Ol	Fo100	4.84739	2.31323	-4.01686	1.15661	4	1.06245	4.1166	-4.23502	1.45544	8	0.219088	1.85905	8.9	[1]
Spinel#1	Spinel	10.8739	2.72468	-6.19955	1.36234	4	2.42452	1.03436	-2.88016	0.365703	8	-3.32898	1.41057	17.18	[2]
Madagascar hibonite	Hibonite	4.85326	0.987969	-5.91271	0.493984	4	2.42452	1.03436	-2.88016	0.365703	8	-3.04131	0.614621	10.83	[2]
aInstrumental bias in d18O from d18O values determinted by laser fluorination.
bCorrection factors of instrumental bias caused by chemical compositions of Ryugu chondrules and CAIs (matrix effect).
References:
[1] Kita N.T., Nagahara H., Tachibana S., Tomomura S., Spicuzza M.J., Fournelle J.H., and Valley J.W. (2010) High precision SIMS oxygen three isotope study of chondrules in LL3 chondrites: Role of ambient gas during chondrule formation. Geochimica et Cosmochimica Acta 74, 6610-6635.
[2] Ushikubo T., Tenner T.J., Hiyagon H., and Kita N.T. (2017) A long duration of the 16O-rich reservoir in the solar nebula, as recorded in fine-grained refractory inclusions from the least metamorphosed carbonaceous chondrites. Geochimica et Cosmochimica Acta 201, 103-122.
